# Supplementary material for: Lactobacillus fermentum remodeled the lung microbiota by crosstalk with the gut and lungs and regulated the PI3K–AKT pathway to alleviate acute lung injury
Source: Royal Society of Chemistry journal article supplement (doi:10.1039/d5fo04619j), 2026-01-01
Supplement: d5fo04619j1.pdf [file d5fo04619j1.pdf]

**Supplementary Table 1. Primer sequences used for Real-time PCR analysis.**

| Gene name       | Forward Sequence (5'-3') | Reverse Sequence (5'-3') |
|-----------------|--------------------------|--------------------------|
| <b>Gapdh</b>    | TGGTGAAGCAGGCATCTGAG     | TGCTGTTGAAGTCGCAGGAG     |
| <b>ZO-1</b>     | GCCGCTAAGAGCACAGCAA      | GCCCTCCTTTTAACACATCAGA   |
| <b>MUC-2</b>    | AGGGCTCGGAACTCCAGAAA     | CCAGGGAATCGGTAGACATCG    |
| <b>Occludin</b> | GGAGGACTGGGTCAGGGAATA    | CGTCGTCTAGTTCTGCCTGT     |
| <b>PI-3K</b>    | GCAGAGGGCTACCAGTACAGA    | CTGAATCCAAGTGCCACTAAGG   |
| <b>AKT</b>      | ATGAACGACGTAGCCATTGTG    | TTGTAGCCAATAAAGGTGCCAT   |
| <b>iNOS</b>     | CAGGAAGAAATGCAGGAGATGG   | TGTCCTGAACGTAGACCTTGG    |
| <b>NF-κB</b>    | CTGGGCACCAGTTCGATGG      | TGACAGCATAAGGCACACACT    |

**Supplementary Table 2. List of antibodies used.**

| Antibody name                                | Catalog  | Manufacturer |
|----------------------------------------------|----------|--------------|
| <b>Anti-F4/80 antibody</b>                   | ab6640   | Abcam        |
| <b>Anti-Myeloperoxidase antibody</b>         | ab208670 | Abcam        |
| <b>Anti-ZO1 tight junction protein</b>       | ab221547 | Abcam        |
| <b>Anti-MUC2 antibody</b>                    | ab272692 | Abcam        |
| <b>Anti-Occludin antibody</b>                | ab216327 | Abcam        |
| <b>Anti-TNF alpha antibody</b>               | ab6671   | Abcam        |
| <b>PI3K/AKT signalling pathway panel</b>     | ab283852 | Abcam        |
| <b>Anti-RAGE antibody</b>                    | ab216329 | Abcam        |
| <b>Anti-Prosurfactant Protein C antibody</b> | ab211326 | Abcam        |

**Supplementary Figure 1. Heat map of differential metabolites in the top 30 of intestinal and lung tissues**

As shown in Supplementary Figure 1A, compared with the NC group, the contents of pro-inflammatory metabolites (LPS 20:5, N-Acetylmuramic acid, N-Acetylmuramate, Cadaverine), endogenous cannabinoid-like substances and their related lipid mediators (Linoleoyl Ethanolamide, Palmitoyl Ethanolamide, N-Oleoyl ethanolamine, N-Linoleoyl Leucine, N-Palmitoyl Glutamine, N-Linoleoyl Methionine), amino acids and their metabolites (Thr, Norleucine, N-(3-Oxobutyl)-tyrosine, beta-Alanine), polyamines and their derivatives (N1-Acetylspermidine, N8-Acetylspermidine), nucleotide metabolites (2'-Deoxyuridine, 6,8-Dihydroxypurine), phospholipids

and their derivatives (PS(16:1(9Z)/18:1(9Z)), DG(18:1(11Z)/18:0/0:0)), aromatic compounds and phytochemicals (Cardamonin, Phenethylamine, 2-Phenylethanol) in the gut metabolites of the LF group decreased, while the contents of phospholipids (PE O-18:4\_4:0, LysoPC(22:4(7Z,10Z,13Z,16Z)/0:0)) and 2,5-Dihydroxybenzoate, 3-Phosphoglycerate and Soyasaponin V increased.

As shown in Supplementary Figure 1B, compared with the NC group, the increased metabolites in the intestinal tract of the LPS group were lipids (LPE 15:0, PC(P-16:0/18:4(6Z,9Z,12Z,15Z))), and PE-Cer 23:3; 2O/16:2; O, PE(16:0/20:4(5Z,8Z,11Z,14Z)), PC(18:1(12Z)-2OH(9,10)/2:0), PC(2:0/18:1(12Z)-2OH(9,10)), bile acids and their derivatives (Tauroursodeoxycholic acid, 7beta-Hydroxy-3,12-dioxo-5beta-cholan-24-oic acid, 3.alpha.,7.alpha.,12.alpha.-Trihydroxycholestanic acid), amino acids and short peptides (Tyr Arg Lys Asp, Met Arg Trp, Gln Ser Tyr Phe Val), signaling molecules and neuroactive substances (Inositol cyclic phosphate, GABA-C7:0), etc. The metabolites reduced in the intestinal tract of the LPS group were lipids (LDGCC 18:3, N-Oleoyl ethanolamine), steroid hormones (5-alpha-Pregnan-3,20-dione), short peptides (Glutamylvaline), etc.

Compared with the NC group (Supplementary Figure 1C), the LF group had increased metabolites in lung tissue, mainly phospholipid (PC(P-18:1(11Z)/18:3(9Z,12Z,15Z)), PC(P-16:0/18:4(6Z,9Z,12Z,15Z)), PS(15:0/22:4(7Z,10Z,13Z,16Z)). The PG Chambers, PE (thus z (5 z, z 8, 11)/he (e 5 z, 8, 10 z, z, 15 e, z) 19-2 oh (7 s, s) 17), PE (" (e 5 z, 8, 10 z, z, 15 e, z) 19-2 oh (7 s, s) 17 / whoever (10 4 z, 7 z, z, z, z) of 16), PG (" (z, z, z, 10, 13, z z, z) 19/20:4 (z 8 z, 11, 14 z, z) of 17), PE (" (z, z, z, 10, 13, z z, z) 19/18:1 (z) - 2 oh (9, 10)), PG (16:0 / plot (z) 5 z, 8 z, 11), PS (15:0 again/(z, z) 14), PG (18:2 (z, z)/he (z, z, z, 10, 13, z z, z) 19) PG (16:0 / plot (8 z, z, z) 14), PG (now 11 (z)/he (z, z, z, 10, 13, z z, z) 19), PG ((z, z)/is not certain (z, z, z, 10, 13 z, z) of 16), Z PA (part (11)/he (z, z, z, 10, 13, z z, z) 19)), sheath (PE - Cer; therefore again 2 o /; O, Cer(t18:0/LTE4), SMGDG O-18:2\_20:4), amino acids and their derivatives (Tyrosine methyl ester, Kynurenine, Choly-L-dopa), etc. The decreased metabolites were 2-Phosphoglycerate, DG(22:6(4Z,7Z,10Z,13Z,16Z,19Z)/24:1(15Z)/0:0), PGF1alpha, Pro Glu Glu Leu Gly, etc.

Compared with the NC group (Supplementary Figure 1D), compared with the NC group, the LPS group had increased metabolites in lung tissue, mainly phospholipids (PC(P-16:0/18:4(6Z,9Z,12Z,15Z))), LPC O-18:2, PG 44:12, and LPC O-18:2. PE(22:6(5Z,8E,10Z,13Z,15E,19Z)-2OH(7S, 17S)/22:5(4Z,7Z,10Z,13Z,16Z)), BMP 44:12, PG ((z, z)/is not certain (z, z, z, 10, 13 z, z) of 16), PG (18:2 (z, z)/he (z, z, z, 10, 13 z, z, z) 19), PG(18:1(11Z)/22:6(4Z,7Z,10Z,13Z,16Z,19Z)), sphingolipid (Cer(t18:0/LTE4), SMGDG O-18:2\_20:4) oxidative stress and damage markers (Methylmalondialdehyde, SMGDG O-18:2\_20:4) Succinaldehyde), and lysophosphatidylcholine was the main metabolite reduced

(LysoPC(20:5(5Z,8Z,11Z,14Z,17Z)/0:0), LPC 20:5, LysoPC(20:2(11Z,14Z)/0:0), LysoPC(20:3(8Z,11Z,14Z)/0:0)), PS(22:6/0:0), Cytidine-5-Monophosphate etc.

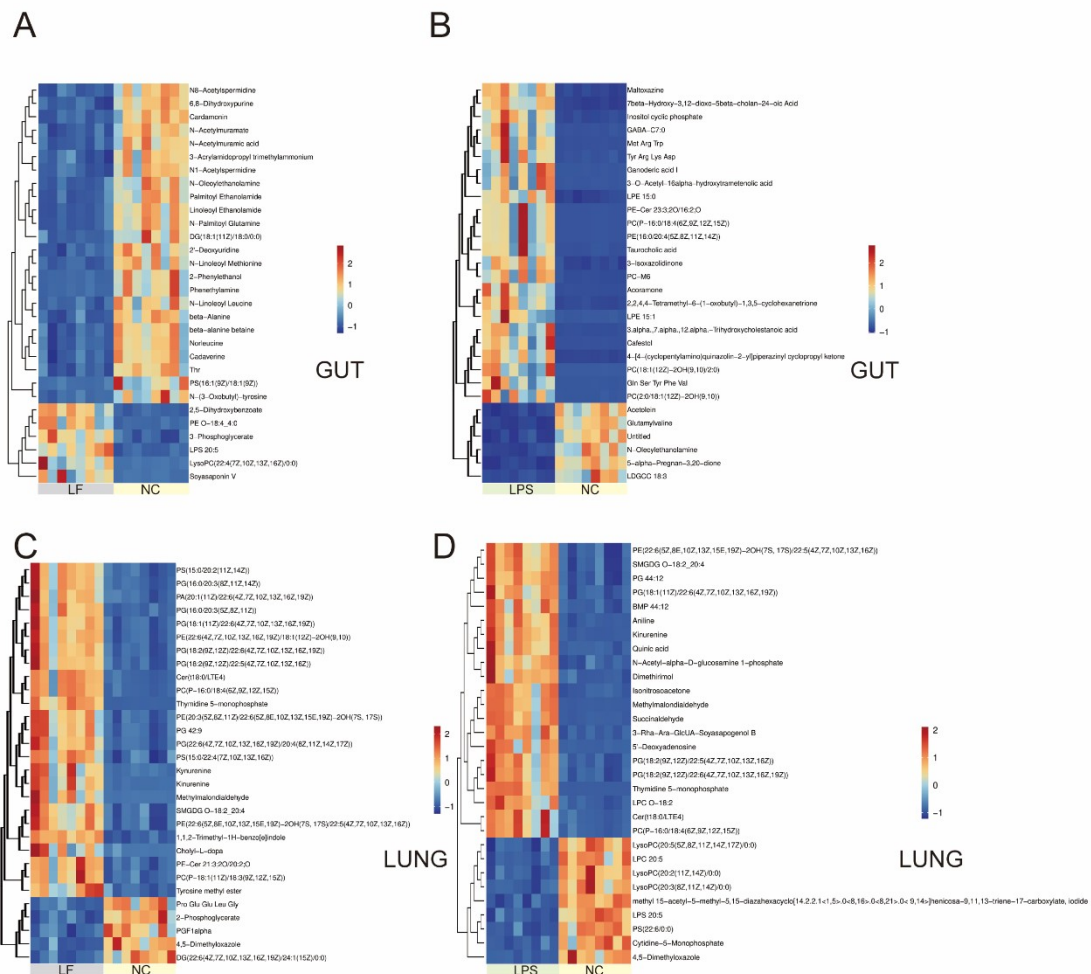

**Supplementary Figure 1. A and B: Differentially expressed metabolites in the mouse gut top 30, LF vs. NC, LPS vs. NC. C and D: Differentially expressed metabolites in the mouse lung top 30, LF vs. NC, LPS vs. NC.**

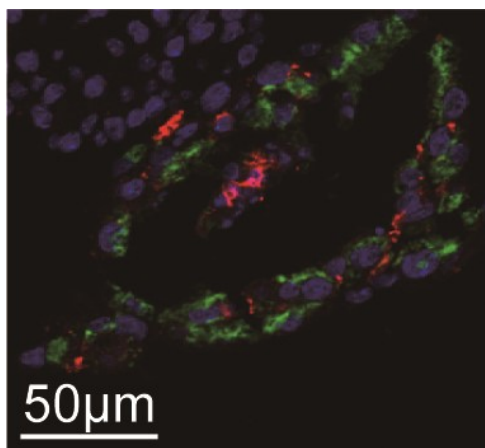

**Supplementary Figure 2. Identification of alveolar organoids. The red signal represents the expression of RAGE, the green signal represents the expression of Prosurfactant Protein C, and the blue signal represents DAPI staining.**
